# Supplementary material for: Shedding light on eDNA: neither natural levels of UV radiation nor the presence of a filter feeder affect eDNA-based detection of aquatic organisms
Source: PLoS One. 2018 Apr 6;13(4):e0195529. doi: 10.1371/journal.pone.0195529 (PMC5889167; doi:10.1371/journal.pone.0195529)
Supplement: S2 Table — (XLSX) [file pone.0195529.s003.xlsx]

## Sheet: Tabelle1
Table S2: GenBank accession numbers for previously published sequences used for primer design.
Species name	Genebank Accession Number
Jaera albifrons	KT209388
	KT209248
	KT209171
	KT209037
	KT209028
	KT209002
	KT208466
	KT208400
	FJ581736
Proasellus meridianus	JQ921523
	JQ921521
	JQ921324
	JQ921322
	JQ921321
	JQ921320
	JQ921319
	JQ921317
	JQ921316
	JQ921314
	JQ921313
	JQ921311
	JQ921308
	JQ921305
	JQ921304
	JQ921302
	JQ921300
	JQ921299
	JQ921297
	JQ921294
	JQ921292
	JQ921290
	JQ921289
	JQ921286
	JQ921285
	JQ921522
	JQ921323
	JQ921318
	JQ921315
	JQ921312
	JQ921310
	JQ921309
	JQ921307
	JQ921306
	JQ921303
	JQ921301
	JQ921298
	JQ921296
	JQ921295
	JQ921293
	JQ921291
	JQ921288
	JQ921287
Proasellus coxalis	JQ921174
	JQ921173
	JQ921172
	JQ921170
	JQ921169
	JQ921166
	JQ921165
	JQ921163
	JQ921162
	JQ921161
	JQ921160
	JQ921159
	JQ921157
	JQ921156
	JQ921154
	JQ921153
	JQ921152
	JQ921147
	JQ921145
	JQ921142
	JQ921141
	JQ921139
	JQ921138
	JQ921137
	AY028588
	DQ144752
	DQ144777
	JQ921171
	JQ921168
	JQ921167
	JQ921164
	JQ921158
	JQ921155
	JQ921151
	JQ921150
	JQ921149
	JQ921148
	JQ921146
	JQ921144
	JQ921143
	JQ921140
